## Correction for: Swimming exercise stimulates IGF1/PI3K/Akt and AMPK/SIRT1/PGC1 $\alpha$ survival signaling to suppress apoptosis and inflammation in aging hippocampus

Jing-Ying Lin<sup>1,\*</sup>, Wei-Wen Kuo<sup>2,\*</sup>, Rathinasamy Baskaran<sup>3</sup>, Chia-Hua Kuo<sup>4</sup>, Yun-An Chen<sup>2</sup>, William Shao-Tsu Chen<sup>5</sup>, Tsung-Jung Ho<sup>6</sup>, Cecilia Hsuan Day<sup>7</sup>, B. Mahalakshmi<sup>8</sup>, Chih-Yang Huang<sup>9,10,11,12</sup>

<sup>1</sup>Department of Medical Imaging and Radiological Science, Central Taiwan University of Science and Technology, Taichung, Taiwan

<sup>2</sup>Department of Biological Science and Technology, China Medical University, Taichung, Taiwan

<sup>3</sup>Department of Bioinformatics and Medical Engineering, Asia University, Taichung, Taiwan

<sup>4</sup>Laboratory of Exercise Biochemistry, University of Taipei, Taipei, Taiwan

<sup>5</sup>Division of Addictive Medicine, Hualien Tzu Chi Hospital, Buddhist Tzu Chi Medical Foundation, Tzu Chi University, Hualien, Taiwan

<sup>6</sup>Department of Chinese Medicine, Hualien Tzu Chi Hospital, Buddhist Tzu Chi Medical Foundation, Tzu Chi University, Hualien, Taiwan

<sup>7</sup>Department of Nursing, MeiHo University, Pingtung, Taiwan

<sup>8</sup>Institute of Research and Development, Duy Tan University, Da Nang, Vietnam

<sup>9</sup>Graduate Institute of Biomedical Sciences, China Medical University, Taichung, Taiwan

<sup>10</sup>Center of General Education, Buddhist Tzu Chi Medical Foundation, Tzu Chi University of Science and Technology, Hualien, Taiwan

<sup>11</sup>Department of Medical Research, China Medical University Hospital, China Medical University, Taichung, Taiwan

<sup>12</sup>Department of Biotechnology, Asia University, Taichung, Taiwan

\*Equal contribution

**Correspondence to:** Chih-Yang Huang; email: [cyhuang@mail.cmu.edu.tw](mailto:cyhuang@mail.cmu.edu.tw)

**Original article:** *Aging (Albany NY)* 2020; 12: pp 6852-6864

PMID: 32320382    PMCID: [PMC7202519](https://pubmed.ncbi.nlm.nih.gov/32320382/)    doi: [10.18632/aging.103046](https://doi.org/10.18632/aging.103046)

**This article has been corrected:** The authors requested to add missing affiliation of corresponding author Chih-Yang Huang. This correction does not change the content of the publication. The correct list of authors and affiliations is provided below:

Jing-Ying Lin<sup>1,\*</sup>, Wei-Wen Kuo<sup>2,\*</sup>, Rathinasamy Baskaran<sup>3</sup>, Chia-Hua Kuo<sup>4</sup>, Yun-An Chen<sup>2</sup>, William Shao-Tsu Chen<sup>5</sup>, Tsung-Jung Ho<sup>6</sup>, Cecilia Hsuan Day<sup>7</sup>, B. Mahalakshmi<sup>8</sup>, Chih-Yang Huang<sup>9,10,11,12,13</sup>

<sup>1</sup>Department of Medical Imaging and Radiological Science, Central Taiwan University of Science and Technology, Taichung, Taiwan

<sup>2</sup>Department of Biological Science and Technology, China Medical University, Taichung, Taiwan

<sup>3</sup>Department of Bioinformatics and Medical Engineering, Asia University, Taichung, Taiwan

<sup>4</sup>Laboratory of Exercise Biochemistry, University of Taipei, Taipei, Taiwan

<sup>5</sup>Division of Addictive Medicine, Hualien Tzu Chi Hospital, Buddhist Tzu Chi Medical Foundation, Tzu Chi University, Hualien, Taiwan

<sup>6</sup>Department of Chinese Medicine, Hualien Tzu Chi Hospital, Buddhist Tzu Chi Medical Foundation, Tzu Chi University, Hualien, Taiwan

<sup>7</sup>Department of Nursing, MeiHo University, Pingtung, Taiwan

<sup>8</sup>Institute of Research and Development, Duy Tan University, Da Nang, Vietnam

<sup>9</sup>Graduate Institute of Biomedical Sciences, China Medical University, Taichung, Taiwan

<sup>10</sup>Center of General Education, Buddhist Tzu Chi Medical Foundation, Tzu Chi University of Science and Technology, Hualien, Taiwan

<sup>11</sup>Department of Medical Research, China Medical University Hospital, China Medical University, Taichung, Taiwan

<sup>12</sup>Department of Biotechnology, Asia University, Taichung, Taiwan

<sup>13</sup>Cardiovascular and Mitochondrial Related Disease Research Center, Hualien Tzu Chi Hospital, Buddhist Tzu Chi Medical Foundation, Tzu Chi University of Science and Technology, Hualien, Taiwan

\*Equal contribution
